# Supplementary material for: Isotopomer labeling and oxygen dependence of hybrid nitrous oxide production
Source: Copernicus journal article supplement (doi:10.5194/egusphere-2023-2642), 2023-11-28
Supplement: Supplementary file 1 [file Table S1.xlsx]

## Sheet: Sheet1
Table S1. CTD bottle data, ambient nutrient concentrations, and optode [O2] measurements for each experimental depth. Optode [O2] is calculated from the mean O2 measured by chemiluminescent optodes at each of three timepoints.
Station	Feature description	Feature abbreviation	Longitude (W)	Latitude [N]	CTD Pressure [db]	CTD Depth [m]	Sigma theta [kg/m3]	CTD Salinity [psu]	CTD Temperature [C]	PAR [µE/m2/s]	Seabird O2 [umol/L]	NO3– [uM]	NO2– [uM]	NH4+ [nM]	Optode O2 [umol/L]	Optode O2 stdev [umol/L]
PS1	Upper oxic-anoxic interface	Interface	113	10	100.706	100.113	26.1163	34.793	13.5855	1e-12	0	29.5611	0.01	3.7
	Midpoint of upper oxycline	Mid-oxycline	113	10	60.367	60.017	23.4607	34.278	22.7517	0.80223	96.353	8.35399	1.065	8.75
	Secondary chlorophyll max.	SCM	113	10	121.547	120.824	26.2633	34.802	12.8977	0.48574	0	31.1333	0.02	2.14
	Mixed layer	Surface	113	10	30.826	30.65	21.473	33.6804	27.7903	371.78	200.339	0.102702	0.02	0
	Top of upper oxycline	Top of oxycline	113	10	50.145	49.855	21.602	33.6788	27.3908	2.3128	197.857	0.0859553	0.74	89.79
PS2	Top of deep oxycline below ODZ	Base of ODZ	105	15.7667	807.189	800.883	27.242	34.5433	5.6681	0.018877	0	42.5768	0	2.615	17.6967	0.113852
	ODZ core, deep	Deep ODZ core	105	15.7667	605.204	600.767	27.0395	34.5554	7.2678	0.019829	0	35.1628	0	4.76	19.1999	0.834163
	Within deep oxycline below ODZ	Deep oxycline	105	15.7667	1009.58	1001.21	27.3598	34.537	4.6246	0.019309	6.753	44.6554	0	1.615	14.7668	0.173855
	Upper oxic-anoxic interface	Interface	105	15.7667	92.846	92.279	25.4618	34.6438	16.4804	7.9633	6.493	25.6256	0.095	12.95	9.48073	0.0938441
	Primary nitrite max.	PNM	105	15.7666	75.61	75.152	24.4554	34.4252	19.5068	29.493	72.838	19.7266	0.13	12.2	79.0509	1.25867
	Secondary chlorophyll max.	SCM	105	15.7667	126.027	125.248	25.9775	34.7632	14.1404	0.211008	0	26.2411	0.299453	50	0	0.0336028
	Secondary nitrite max.	SNM	105	15.7667	254.902	253.247	26.5088	34.739	11.3794	0.027345	0.795	24.5217	1.74007	3.86	0	0.0400599
	Top of upper oxycline	Top of oxycline	105	15.7667	55.108	54.777	23.2412	34.5836	24.2981	170.5	212.136	0.581173	0.01	34.8	211.692	2.56885
PS3	ODZ core, deep	Deep ODZ core	102.35	17.6833	604.843	600.35	27.0482	34.5683	7.2776	0.019482	0	42.5487	0.28	5.26	0	0.0127737
	Within deep oxycline below ODZ	Deep oxycline	102.35	17.6833	905.621	898.247	27.3044	34.5491	5.1912	0.019511	2.026	46.2305	0	9	2.69171	0.0299202
	Oxic-anoxic interface, cast 87	Interface	102.35	17.6833	39.9395	39.697	24.9563	34.6114	18.08	0.0282835	12.4755	18.8099	0.225	6.345	11.6472	0.038912
	Oxic-anoxic interface, cast 100	Interface2	102.35	17.6833	63.261	62.873	25.4397	34.7129	16.3883	0.026914	0.641	23.4731	0.6	15.85	2.2	0.0327293
	Midpoint of upper oxycline	Mid-oxycline	102.35	17.6834	24.891	24.74	24.0276	34.4613	21.2117	0.034704	112.416	8.0316	0.33	12.39	94.5566	0.251942
	Secondary chlorophyll max.	SCM	102.35	17.6833	63.3185	62.9305	25.6434	34.7555	15.6401	0.0263285	0	22.8332	0.6	15.85	0	0.0118067
	Secondary nitrite max.	SNM	102.35	17.6833	182.912	181.738	26.3429	34.8183	12.567	0.025287	0	21.8778	2.67	4.18	0	0.0138479
	Top of upper oxycline	Top of oxycline	102.35	17.6833	14.684	14.595	23.0983	34.5147	24.593	0.06932	210.976	0.327276	0.4	399.62	170.822	0.859224
