# Supplementary material for: Isotopomer labeling and oxygen dependence of hybrid nitrous oxide production
Source: Copernicus journal article supplement (doi:10.5194/egusphere-2023-2642), 2023-11-28
Supplement: Supplementary file 2 [file Table S2.xlsx]

## Sheet: Sheet1
Table S2. Rates of NH3 oxidation to NO2– + NO3–, NO2– oxidation to NO3–, and NO3– reduction to NO2– at stations PS1. Errors are calculated from the error of the slope of product 15N vs. time.
Station	Feature	NH4+ oxidation (nM/day)	𝜎	product AF slope p-value	NO2– oxidation (nM/day)	𝜎	product AF slope p-value	NO3– reduction to NO2– (nM/day)	𝜎	product AF slope p-value
PS1	Interface	0.19241	0.000406358	0.00016738	0	0	0.650986	0	0	0.510885
	Mid-oxycline	0.524856	0.00155683	7.43685e-05	-7.11814	4.40107	0.075967	0	0	0.139254
	SCM	0.453746	0.0019784	0.00337011	0	0	0.682603	0	0	0.907606
	Surface	0	0	0.762267	0	0	0.444256	0.542931	0.0359512	0.00690674
	Top of oxycline	0	0	0.721978	0	0	0.265012	0	0	0.5914
PS2	Base of ODZ	0.514304	0.0871603	0.0458907	0	0	0.160555	0	0	0.688776
	Deep ODZ core	0	0	0.403011	13.0519	0.0788778	0.000514798	33.244	0.143373	0.000187896
	Deep oxycline	0.265295	0.00164213	0.0245033	0	0	0.788974	0	0	0.780981
	Interface	2.21	0.167475	2.157e-05	27.0102	0.48915	0.00617104	0	0	0.595066
	PNM	1.3946	0.204971	0.000188088	0	0	0.131442	0	0	0.456298
	SCM	0	0	0.769337	81.0004	0.228859	3.64344e-06	24.3232	0.110854	9.37706e-07
	SNM	0	0	0.95405	0	0	0.295992	0	0	0.19658
	Top of oxycline	0.054285	0.0013219	0.0388432	0	0	0.166867	0	0	0.995587
PS3	Deep ODZ core	0	0	0.32284	-270.995	15.2861	0.00917039	10.8821	0.176363	0.0276164
	Deep oxycline	0.302506	0.00459625	0.0195194	0	0	0.225934	0	0	0.677372
	Interface	0.876479	0.0645222	0.000109274	0	0	0.598336	0	0	0.16482
	Interface2	4.67898	0.067964	7.40825e-08	0	0	0.2912	0	0	0.439568
	Mid-oxycline	0	0	0.782941	0	0	0.101381	0	0	0.815595
	SCM	0.57473	0.0705975	0.0218805	0	0	0.115297	19.2008	0.133355	1.30351e-07
	SNM	0	0	0.996484	465.335	86.1465	0.0177542	0	0	0.263659
	Top of oxycline	0	0	0.605829	0	0	0.91168	0	0	0.795676
