# Supplementary material for: Isotopomer labeling and oxygen dependence of hybrid nitrous oxide production
Source: Copernicus journal article supplement (doi:10.5194/egusphere-2023-2642), 2023-11-28
Supplement: Supplementary file 3 [file Table S3.xlsx]

## Sheet: Sheet1
Table S3. Fractionation factors used the time-dependent numerical model.
Process	15𝜀bulk (‰)	15𝜀𝛼 (‰)	15𝜀𝛽 (‰)	Reference
NH4+ oxidation	22			Santoro and Casciotti, 2011
NO2– oxidation	-15			Casciotti, 2009
NO3– reduction to NO2-	5			Granger et al., 2008
N2O reduction to N2		11.8	0	Kelly et al., 2021
