# Supplementary material for: Isotopomer labeling and oxygen dependence of hybrid nitrous oxide production
Source: Copernicus journal article supplement (doi:10.5194/egusphere-2023-2642), 2023-11-28
Supplement: Supplementary file 4 [file Table S4.xlsx]

## Sheet: Sheet1
Table S4. Rates of N2O production from solely NH4+, N2O production from NO2–, N2O production from NO3–, and hybrid N2O production in pM/day at each experimental depth. production rate error bars are calculated from 100 model optimizations, varying key parameters by up to 25%.
Station	Feature	N2O production from NO3– (pM/day)	𝜎	N2O production from NO2– (pM/day)	𝜎	Hybrid N2O production (pM/day)	𝜎	N2O production from solely NH4+ (pM/day)	𝜎	f	𝜎
PS1	Interface	1306.01	220.481	8.40397	0.869777	54.063	7.12754	0	0	0.44746	0.103196
	Mid-oxycline	0	0	1.49193	0.159113	1.26344	0.185089	0	0	0.339711	0.026621
	SCM	166.199	22.8882	1.34876	0.0334408	25.898	1.3182	0.193847	0.117404	0.498646	0.000418258
	Surface	0	0	0	0	0.324477	0.0189045	0	0	0.485081	0.00242516
	Top of oxycline	0	0	0	0	1.17256e-11	1.17256e-10	0.0117919	0.00245743	N/A	N/A
PS2	Base of ODZ	0	0	12.4769	1.25583	63.0544	6.59356	0	0	0.563775	0.00487992
	Deep ODZ core	206.596	42.5014	5.2205	0.348454	6.47284	7.14089	0.226922	0.838601	0.225439	0.241132
	Deep oxycline	0	0	0	0	0	0	0	0	N/A	N/A
	Interface	73.0726	10.5059	8.91142	0.253769	39.0313	8.30595	0.466716	0.140844	0.193546	0.141276
	PNM	12.2071	1.86869	0	0	0.671643	0.0318562	0.319479	0.0573417	0.522915	0.0617431
	SCM	717.431	118.646	42.4488	1.13465	52.7131	13.4182	0	0	0.379626	0.127427
	SNM	321.654	51.4168	67.7378	8.68673	6.29169	2.25352	1.61754	0.803764	0.439992	0.0850145
	Top of oxycline	0	0	0	0	0.191233	0.0268776	0.00981035	0.00427525	0.999944	0.000310594
PS3	Deep ODZ core	37.4996	5.83508	13.4066	0.583408	33.2189	1.99989	0.0180456	0.0322023	0.408827	0.00138447
	Deep oxycline	0	0	2.56814	0.0593802	16.4205	0.788447	0.139132	0.0354339	0.377976	0.000326823
	Interface	107.887	15.8818	0	0	0.116181	0.25907	0.0156244	0.0373428	0.801052	0.336524
	Interface2	1633.4	377.334	8.79991	17.7462	233.855	75.2381	1.45924	8.0358	0.385241	0.207233
	Mid-oxycline	0.568862	0.24821	0.160294	0.00833437	0.406121	0.030637	0.123067	0.0386794	0.001229	0.00857801
	SCM	1626.75	264.647	509.752	34.6277	152.477	19.8559	8.10802	2.12777	0.33033	0.15219
	SNM	677.632	103.659	37.2713	6.05892	50.3417	38.5175	0.270132	0.40437	0.940255	0.153141
	Top of oxycline	0	0	0.0517605	0.00295447	0.0612831	0.00451	0.259915	0.0574551	0.999904	0.000328177
